# Supplementary material for: Economic development and coastal ecosystem change in China
Source: Springer Nature journal article supplement (doi:10.1038/srep05995), 2014-08-08
Supplement: 41598_2014_BFsrep05995_MOESM1_ESM.pdf [file 41598_2014_BFsrep05995_MOESM1_ESM.pdf]

**Supplementary Information for**

**Economic development and coastal ecosystem change in China**

Qiang He, Mark D. Bertness, John F. Bruno, Bo Li, Guoqian Chen, Tyler C. Coverdale, Andrew

H. Altieri, Junhong Bai, Tao Sun, Steven C. Pennings, Jianguo Liu, Paul R. Ehrlich, Baoshan

Cui\*

\* Corresponding author: Baoshan Cui

## Supplementary Methods

**Human impacts.** For fishing, we considered two impact drivers - China's fish catch in exclusive economic zones and globally. Global fish catch (and oceangoing freight; see below) were included in the analysis to more inclusively examine the marine impacts of China's booming economy, and their inclusion (or omission) does not change the overall results of our research. Data of specific species groups generally had the same trends, and were not included as individual impacts nor further analyzed to reduce interdependence.

For waste emissions, we considered three sources of land-based pollutant discharge (excess watershed fertilizers, watershed industrial water pollution, and coastal sewage) and two sources of ocean-based pollutant discharge (offshore waste dumping and oilfield production wastewater). We also collected data on CO<sub>2</sub> emissions. Long-term data of the exact amount of each chemical constituent were lacking. Our estimates may not reflect the exact amount of pollutants that deposited into the ocean. Excess watershed fertilizers were estimated as the total amount of fertilizer consumption in China's watershed minus that of plant uptake (see Supplementary Table S6). Watershed BOD was estimated proportional to the industrial GDP and area of the watershed (see Supplementary Table S1). Coastal sewage was estimated as the sum of the coastal provinces'.

For habitat transformations, we considered four impact factors: human uses of coasts and seas for salt production pans and mariculture, and coastal reclamation activities in Shanghai and Jiangsu. Data of long-term coastal reclamations at the scale of China were unavailable.

For transportation disturbance, as maritime transportation has been considered a good proxy for marine species invasions<sup>1,2</sup>, our transportation data should indicate the trajectory of species invasions in coastal China. Long-term, consecutive data of species invasions in coastal China did not exist.

Note: (i) although tourism is a substantial component of China's coastal marine products, we did not include tourism that has been mainly considered an ecosystem service<sup>3-5</sup>; (ii) direct human effects<sup>1</sup> can also be increasing and associated with economic growth (due to attractiveness of better developed regions). Since we analyzed coastal population trends above and found no difference in population growth between pre- and post-reform periods, we did not further analyze direct human effects.

**Quantifying historical trends in coastal degradation.** For sea physical environment, we used long-term observational data of water column temperature, salinity, dissolved oxygen, dissolved nitrogen, PO<sub>4</sub>-P and SiO<sub>3</sub>-Si at permanent sites or along permanent transects in each of the four China's coastal seas<sup>6-9</sup>, often starting from the late 1970s. For depletion of fishery resources, we

used change of trophic level index (the trophic level of primary producers set as 1) and maximum body length data between 1950 and 2006 developed by Sea Around Us Project. Long-term changes in fishery resources in China's seas remained largely unquantified in the primary literature, and a few long-term studies<sup>10,11</sup> in the Bohai and Yellow Seas showed consistent patterns with the estimates of Sea Around Us Project. For algal blooms, we extracted number of red tide occurrences from three sources: (i) Bulletin of Marine Disasters in China ([www.soa.gov.cn](http://www.soa.gov.cn)), (ii) Bulletin of Marine Environmental Status of China ([www.soa.gov.cn](http://www.soa.gov.cn)), and (iii) Chinese scientific literature. The highest number of red tide occurrences in each year reported among these sources was used. Due to a lack of long-term data, we did not quantify the trends in other types of algal blooms. Red tides are the major component of coastal algal blooms in China. For degradation of corals, coral cover at three sites with long-term studies were collected. We extracted coral cover data from each study and computed their means by year at each site. Where available, maximum and minimum coral covers were also extracted and shown. We accounted for methodological variation among these data (see Supplementary Table S3). For loss of coastal wetlands, we used the area data of total coastal wetlands and each of the following major types extracted from a previous study interpreting available satellite images between 1978 and 2008<sup>12</sup>: non-vegetated mud/beach, vegetated marshes/mangroves, estuarine waters, estuarine delta and lagoon. Such data before 1978 were not available. To specifically examine change in mangroves that were not reported in the above study, we extracted mangrove area data from

published literature. Relative wetland/mangrove area at each time point was computed assuming their area in ~ 1978 as 1.

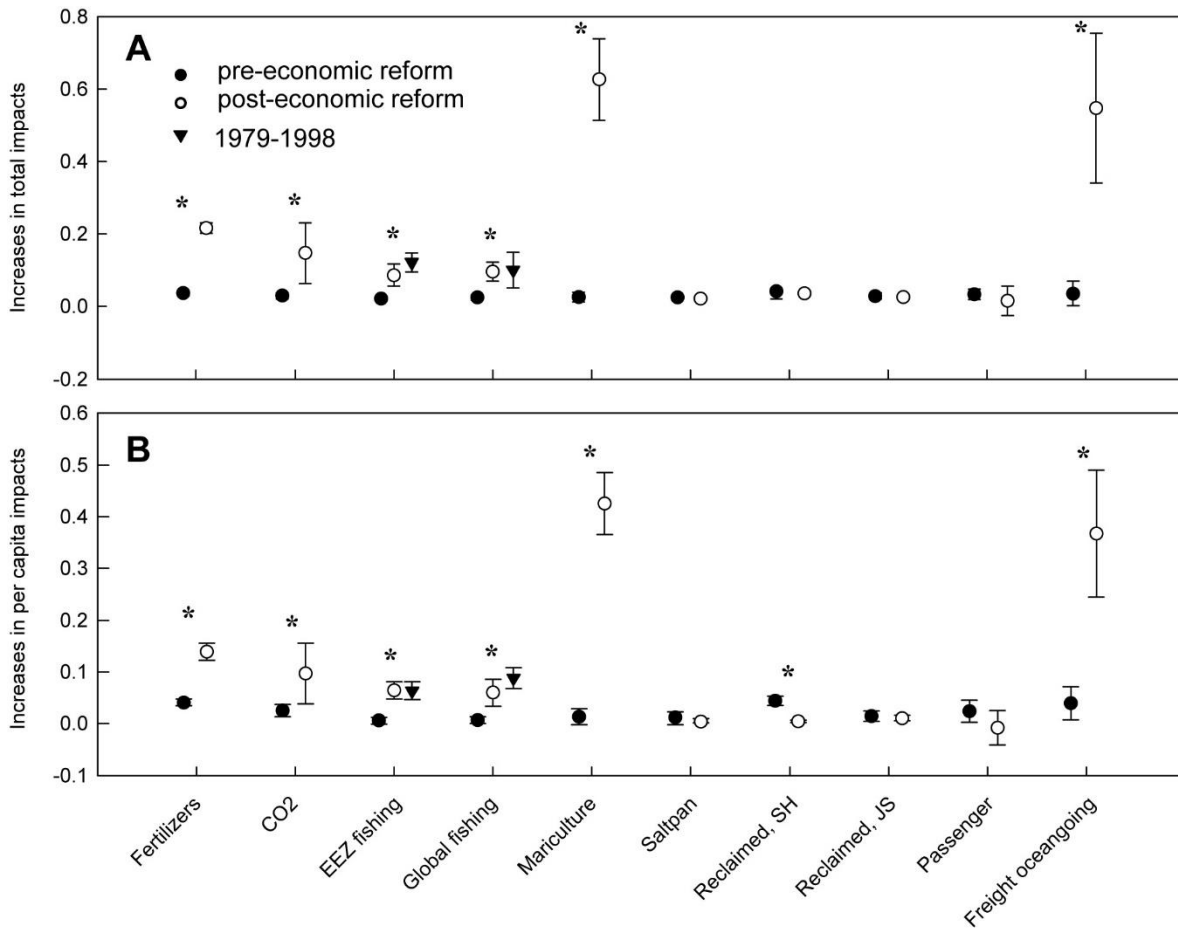

**Supplementary Figure S1** Yearly average increases in various human impacts on China's coastal ecosystems in pre- and post-economic reform periods. **(A)** Total impacts. **(B)** Per capita impacts. Data estimates are based on relative values (1978 = 1) and shown as means and 95% confidence intervals. Differences between pre- and post-reform periods are considered if there is no overlap in their 95% CIs (shown with a \*). For fishing, estimates were also done excluding data since 1999 when fishery catches were mandated as constant. SH and JS indicate Shanghai and Jiangsu, respectively.

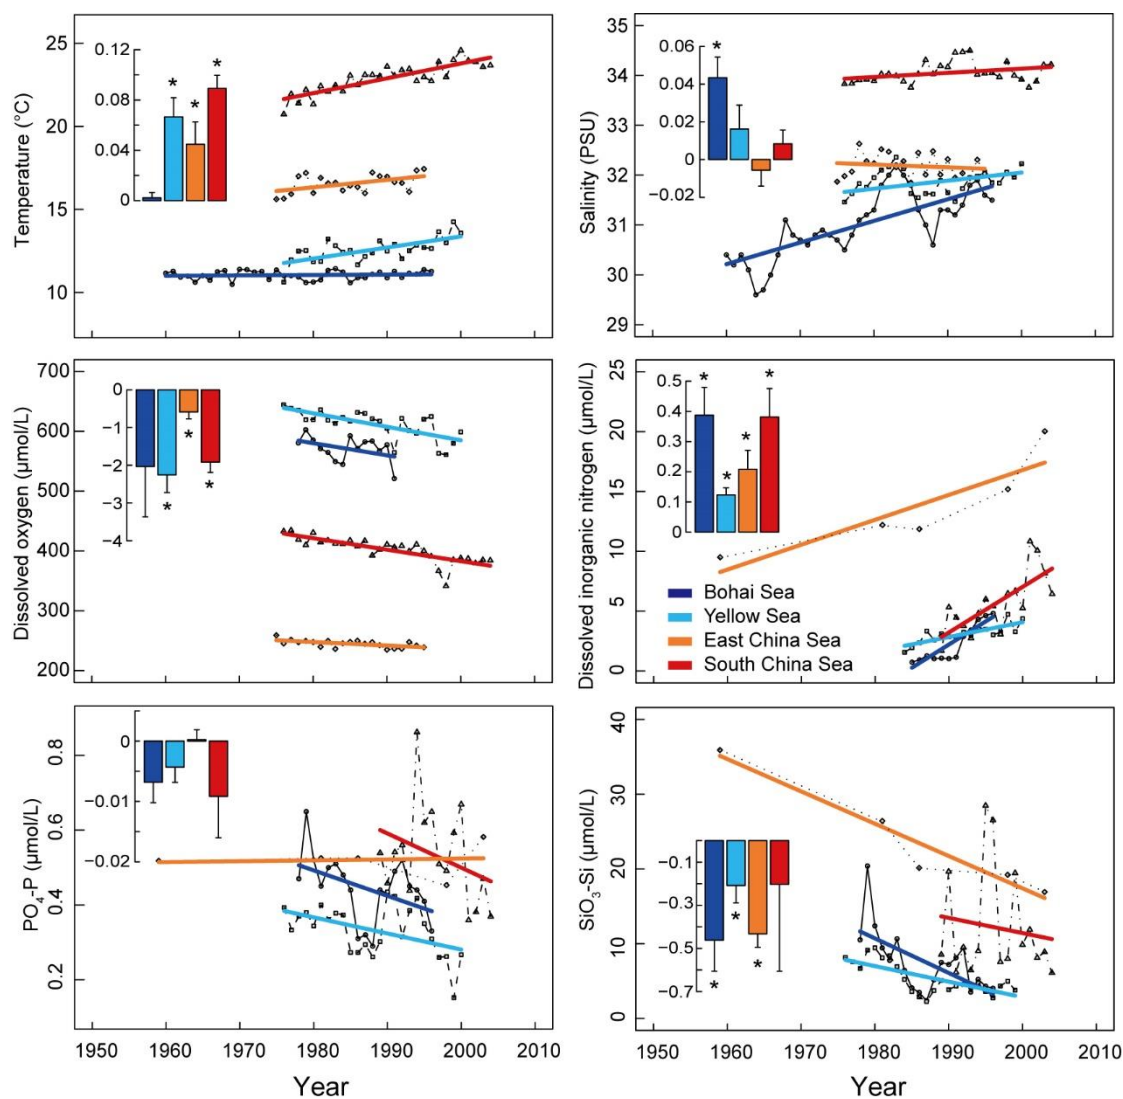

**Supplementary Figure S2** Changing water environments in China's coastal seas: Bohai, Yellow, East China and South China Seas. Insets are plots of the annual rate of change (+ SE).

Significant changes ( $P < 0.05$ ) are indicated with \* above error bars. Data were extracted from long-term observations along permanent transects in each sea (see Methods).

**Supplementary Table S1** Summary of the time-series data of human impacts and data sources.

| Category                | Impact factor                | Explanation                                                                                                                              | Time periods                                                   | Source                                                                                                                                                                                 |
|-------------------------|------------------------------|------------------------------------------------------------------------------------------------------------------------------------------|----------------------------------------------------------------|----------------------------------------------------------------------------------------------------------------------------------------------------------------------------------------|
| Fishing                 | EEZ fishing                  | China's total fish catch in its exclusive economic zones                                                                                 | 1950-2006                                                      | Sea Around Us Project <sup>a</sup> ,<br>www.seaaroundus.org                                                                                                                            |
|                         | Global fishing               | China's total fish catch globally                                                                                                        | 1950-2006                                                      | Sea Around Us Project <sup>a</sup> ,<br>www.seaaroundus.org                                                                                                                            |
| Waste emissions         | Excess watershed fertilizers | Total amount of fertilizer consumption in a year in China's watershed minus that of plant uptake; for calculations, see note <b>b</b>    | 1952, 1957, 1961-2010                                          | FAOSTATS, <a href="http://faostat.fao.org">http://faostat.fao.org</a><br>China Statistical Yearbooks <sup>13</sup>                                                                     |
|                         | Watershed BOD                | Total emissions of organic water pollutant in China's watershed; for calculations, see note <b>c</b>                                     | 1980-2001, 2003-2007                                           | World Resource Institute,<br><a href="http://earthtrends.wri.org">http://earthtrends.wri.org</a><br>World Bank,<br><a href="http://data.worldbank.org/">http://data.worldbank.org/</a> |
|                         | Coastal sewage               | Total volume of sewage discharged in China's coastal provinces                                                                           | 1985-1989, 1991-1995,<br>1998-2010                             | China Statistical Yearbooks <sup>13</sup>                                                                                                                                              |
|                         | Offshore waste dumping       | Total volume of offshore waste dumping                                                                                                   | 1997-2010                                                      | China Marine Statistical Yearbooks <sup>14</sup>                                                                                                                                       |
|                         | Offshore oilfield wastewater | Total volume of oiled wastewater produced from offshore oil production                                                                   | 1999-2010                                                      | China Marine Statistical Yearbooks <sup>14</sup>                                                                                                                                       |
|                         | CO <sub>2</sub>              | China's fossil-fuel CO <sub>2</sub> emissions data (including emissions from cement production and excludes emissions from bunker fuels) | 1950-2010                                                      | The Global Carbon Project,<br>www.globalcarbonproject.org                                                                                                                              |
| Habitat transformations | Salt pans                    | Area data of the total human use of coasts and seas for salt production pans                                                             | 1952, 1957, 1962, 1965,<br>1970, 1975, 1978-1992,<br>1996-2010 | China Marine Statistical Yearbooks <sup>14</sup>                                                                                                                                       |
|                         | Mariculture                  | Area data of the total human use of coasts and seas for mariculture                                                                      | 1957, 1962, 1965, 1970,<br>1975, 1978-1992,                    | China Marine Statistical Yearbooks <sup>14</sup>                                                                                                                                       |



|                |                          |                                                                                       |                                                                      |                                                                    |
|----------------|--------------------------|---------------------------------------------------------------------------------------|----------------------------------------------------------------------|--------------------------------------------------------------------|
|                |                          |                                                                                       | 1994-2010                                                            |                                                                    |
|                | Reclamation,<br>Shanghai | Area data of total reclaimed coasts and seas in<br>Shanghai                           | 1951-1995, 2000, 2009                                                | Refs. 15,16<br>Yearbooks of China Water<br>Resources <sup>17</sup> |
|                | Reclamation,<br>Jiangsu  | Area data of total reclaimed coasts and seas in<br>Shanghai                           | 1951-2008                                                            | Ref. 18                                                            |
| Transportation | Marine<br>passenger      | Total turnover volume of marine passenger<br>transportation (passengerkilometer, pkm) | 1952, 1957, 1962, 1965,<br>1970, 1975, 1978,<br>1981-1992, 1994-2010 | China Marine Statistical Yearbooks <sup>14</sup> .<br>d            |
|                | Coastal freight          | Total turnover volume of coastal freight<br>transportation (ton-kilometer, tkm)       | 1978-2010                                                            | China Marine Statistical Yearbooks <sup>14</sup>                   |
|                | Oceangoing<br>freight    | Total turnover volume of oceangoing freight<br>transportation (tkm)                   | 1951-2010                                                            | China Statistical Yearbooks <sup>13</sup>                          |

Notes: **a**, Bias-corrected the fishery data reported by Food and Agriculture Organization of the United Nations (FAO);

**b**, Excess watershed fertilizers in each year was estimated as

$$EWF_t = \begin{cases} \sum_{i=1}^n \frac{DA_i}{LA_i} \cdot NPK_{i,t} \cdot (1 - r_{i,t}) & t = 1981, 1982, \dots, 2010 \\ NPK_{total,t} \cdot (1 - r_t) \cdot \sum_{i=1}^n \frac{DA_i}{LA_i} \cdot \frac{AA_{i,t}}{AA_{total,t}} & t = 1952, 1957, 1961, \dots, 1980 \end{cases}$$

where  $EWF$  is the excess watershed fertilizer,  $t$  is the time (year),  $i$  is a province of China,  $total$  indicate the total of China,  $DA$ ,  $LA$ ,  $AA$  and  $NPK$  are the drainage area, total land area, agricultural area and fertilizer consumption, respectively, and  $r$  is the coefficient of plant utilization.  $r$  varied with per sown acre fertilization rate ( $\text{kg}/\text{hm}^2$ ) and also geographically. In our study, we used the average  $r$  of different geographical region \* fertilization rate combinations determined in previous studies (Supplementary Table S6)<sup>19,20</sup>. The fertilizer consumption data for each province before 1980 was unavailable, so we used the agricultural area (i.e.  $AA$ ) of each province to estimate fertilizer consumption in each province, and  $r$  based on the national average fertilizer consumption per sown acre. The  $NPK$  data between 1981 and 2010 and in 1952 and 1957 were extracted from China Statistical Yearbooks, while those between 1961 and 1980 (not consecutively presented in China Statistical Yearbooks) were extracted from FAOSTATS. The data of these two sources were generally consistent (FAO rely on the statistics provided by member countries), though FAO did not provide China's province-level data of fertilizer consumption. Additional analysis using data from either source did not compromise our results.  $DA$  and  $LA$  were computed on ArcGIS 9.3 using China's administrative boundaries data (<http://ngcc.sbsm.gov.cn/>) and China's drainage basin map previously developed by Huang *et al.*<sup>21</sup>. For coastal provinces,  $DA$  was set to be equal to  $LA$ . Due to a lack of data,  $AA_i/AA_{total}$  before 1978 was assumed to be the same as in 1978. The allocation pattern of China's agriculture between 1952 and 1978 should not change much over years with the planned economy policy during that period;

**c**, Watershed BOD in each year was estimated as

$$WBOD_t = x_t \cdot \frac{BOD_{wri,t}}{GDP_{ind,t}} \cdot \sum_{i=1}^n \frac{GDP_{ind_{i,t}}}{LA_i} \cdot DA_i$$

where  $WBOD$  is the total amount of the watershed BOD discharge,  $BOD_{wri}$  is the total amount of national daily average BOD emissions estimated by World Resource Institute,  $GDP_{ind}$  and  $GDP_{ind_i}$  are the total amount of gross industrial product of China and province  $i$ , respectively, and  $x$  is the number of days.  $GDP_{ind}$  and  $GDP_{ind_i}$  were extracted from China's National Database of Statistics; and

**d**, For the pre-economic reform period, passenger transportation data of China's total and China's Ministry of Communications' were both available in 1952, 1957, 1962 and 1965, and China's total in 1970, 1975 and 1978 were estimated by dividing those of China's Ministry of Communications' in the same year by their average percentage of China's total in 1952, 1957, 1962 and 1965 (85%, ranging from 81-88%).

**Supplementary Table S2** Summary of the data for the cross-sectional and panel analyses. Due to lack of consistent data or historical boundary changes, some provinces were excluded or combined with others. For the panel analysis, the start of the time period was generally selected in consideration of the availability of consecutive, consistent data.

| Analysis        | Impacts            | Time period              | Provinces included                                                                                                      | Sources of raw data |
|-----------------|--------------------|--------------------------|-------------------------------------------------------------------------------------------------------------------------|---------------------|
| Cross-sectional | Excess fertilizers | 2001-2010                | All except Heilongjiang and Xinjiang                                                                                    | Ref. 13             |
|                 | CO <sub>2</sub>    | 2001-2007                | All except Xizang; Chongqing and Sichuan were combined                                                                  | Ref. 22             |
|                 | Coastal sewage     | 2001-2010                | All 11 coastal                                                                                                          | Ref. 14             |
|                 | Fishery catch      | 2001-2010                | All 11 coastal                                                                                                          | Ref. 14             |
|                 | Mariculture        | 2001-2010                | All 11 coastal                                                                                                          | Ref. 14             |
|                 | Saltpan            | 2001-2010                | All 11 coastal except Shanghai                                                                                          | Ref. 14             |
|                 | Passenger          | 2001-2010                | All 11 coastal except Heibei, Tianjin and Jiangsu                                                                       | Ref. 14             |
|                 | Freight coastal    | 2001-2010                | All 11 coastal                                                                                                          | Ref. 14             |
|                 | Freight oceangoing | 2001-2010                | All 11 coastal                                                                                                          | Ref. 14             |
| Panel           | Excess fertilizers | 1981-2010                | All except Heilongjiang and Xinjiang; The following were combined: (i) Chongqing and Sichuan; (ii) Guangdong and Hainan | Ref. 13             |
|                 | CO <sub>2</sub>    | 1995-2007                | All except Xizang; Chongqing and Sichuan were combined                                                                  | Ref. 22             |
|                 | Coastal sewage     | 1998-2010                | All 11 coastal                                                                                                          | Ref. 14             |
|                 | Fishery catch      | 1978-2010                | All 11 coastal; Guangdong and Hainan were combined                                                                      | Ref. 14             |
|                 | Mariculture        | 1978-2010                | All 11 coastal; Guangdong and Hainan were combined                                                                      | Ref. 14             |
|                 | Saltpan            | 1978-2010 (no 1993-1995) | All 11 coastal except Shanghai; Guangdong and Hainan were combined                                                      | Ref. 14             |
|                 | Passengers         | 1999-2010                | All 11 coastal except Heibei, Tianjin and Jiangsu                                                                       | Ref. 14             |

Freight coastal 1999-2010

All 11 coastal

Ref. 14

Freight 1999-2010

All 11 coastal

Ref. 14

oceangoing

---

**Supplementary Table S3** Summary of searches and selecting criteria of primary literature on coastal degradations in China

| Coastal response | Literature source | Search item                                                                                                                                     | Criteria for selecting studies and data                                                                                                                                                                                                                                                                                                                                                                                                                                                                                                       | Resulting studies |
|------------------|-------------------|-------------------------------------------------------------------------------------------------------------------------------------------------|-----------------------------------------------------------------------------------------------------------------------------------------------------------------------------------------------------------------------------------------------------------------------------------------------------------------------------------------------------------------------------------------------------------------------------------------------------------------------------------------------------------------------------------------------|-------------------|
| Red tides        | CNKI              | SU = red tide AND SU = China + our country AND SU = change + problem + disaster (translated from Chinese)                                       | The study reported the change in number of red tide occurrence over at least 10 years                                                                                                                                                                                                                                                                                                                                                                                                                                                         | Refs.<br>23-31    |
| Corals           | CNKI              | SU = coral AND SU = change (translated from Chinese)                                                                                            | The study reported coral cover at at least one of the following three sites: Daya Bay in Guangdong, Lutuitou of Sanya in Hainan and Woody Island in South China Sea.                                                                                                                                                                                                                                                                                                                                                                          | Refs.<br>32-43    |
|                  | Web of Science    | TS = coral AND TS = (diversity OR richness OR abundance OR cover) AND TS = (South China Sea OR Daya OR Hainan OR Guangdong OR Fujian OR Xiamen) | We used data reported for consistent locations across studies within each site. For the Woody Island, we used coral covers in its northern part that were more often reported, while a few reports of coral cover in other parts were excluded. For similar considerations, coral covers at the four Daya Bay sites Dalajia, Xiaolajia, Bashazhou and Mabianzhou were used while others excluded. Furthermore, we used coral cover estimated with similar methods whenever possible (done by the same research group using the same methods). |                   |
| Mangroves        | CNKI              | SU = mangrove AND SU = change + dynamic AND SU = area (translated from Chinese)                                                                 | The study ( <i>i</i> ) determined change in mangrove area over several time points across at least one decade and ( <i>ii</i> ) included a time point around 1978 (1976-1980)                                                                                                                                                                                                                                                                                                                                                                 | Refs.<br>44-50    |

**Supplementary Table S4** Summary of the results of tests of the EKC relationship between GDP per capita ( $x_t$ ) and various human impacts ( $y_t$ ). NA, not apply or not exist.

| Analysis      | ln( $y_t$ )                 | Unit                | ln $x_t$         | (ln $x_t$ ) <sup>2</sup> | (ln $x_t$ ) <sup>3</sup> | C                | AR(1)          | MA(1)          | Adjusted       |                        | Turning points (USD)<br><sup>b</sup> |
|---------------|-----------------------------|---------------------|------------------|--------------------------|--------------------------|------------------|----------------|----------------|----------------|------------------------|--------------------------------------|
|               |                             |                     |                  |                          |                          |                  |                |                | $R^2$          | EKC shape <sup>a</sup> |                                      |
| Time-series   |                             |                     |                  |                          |                          |                  |                |                |                |                        |                                      |
| Total impacts | Excess watershed fertilizer | 10 <sup>4</sup> t   | 4.29<br>(0.00)   | -0.28<br>(0.00)          | NA                       | -8.36<br>(0.01)  | 0.80<br>(0.00) | NA             | 0.99<br>(0.00) | Inversed<br>U-shaped   | 2251                                 |
|               | CO <sub>2</sub>             | 10 <sup>3</sup> t C | 2.25<br>(0.00)   | -0.12<br>(0.01)          | NA                       | 4.28<br>(0.01)   | 0.79<br>(0.00) | 0.59<br>(0.00) | 0.99<br>(0.00) | Inversed<br>U-shaped   | 11202                                |
|               | EEZ catch                   | t                   | -9.46<br>(0.01)  | 1.64<br>(0.00)           | -0.09<br>(0.01)          | 31.83<br>(0.00)  | 0.69<br>(0.00) | NA             | 0.97<br>(0.00) | Inversed<br>N-shaped   | (98); 2391                           |
|               | EEZ catch (1950-1998)       | t                   | -1.70<br>(0.01)  | 0.19<br>(0.00)           | NA                       | 18.15<br>(0.00)  | 0.70<br>(0.00) | NA             | 0.96<br>(0.00) | U-shaped               | (81)                                 |
|               | Global catch                | t                   | -12.08<br>(0.00) | 2.10<br>(0.00)           | -0.11<br>(0.00)          | 37.02<br>(0.00)  | 0.77<br>(0.00) | NA             | 0.99<br>(0.00) | Inversed<br>N-shaped   | (104); 1983                          |
|               | Global catch (1950-1998)    | t                   | -1.76<br>(0.00)  | 0.19<br>(0.00)           | NA                       | 18.86<br>(0.00)  | 0.87<br>(0.00) | NA             | 0.98<br>(0.00) | U-shaped               | (96)                                 |
|               | Mariculture                 | km <sup>2</sup>     | 4.20<br>(0.00)   | -0.24<br>(0.00)          | NA                       | -8.60<br>(0.00)  | 0.45<br>(0.02) | NA             | 0.99<br>(0.00) | Inversed<br>U-shaped   | 6869                                 |
|               | Saltpan                     | km <sup>2</sup>     | 1.41<br>(0.00)   | -0.09<br>(0.00)          | NA                       | 3.01<br>(0.00)   | NA             | NA             | 0.89<br>(0.00) | Inversed<br>U-shaped   | 2122                                 |
|               | Passenger                   | 10 <sup>8</sup> pkm | 13.43<br>(0.00)  | -1.79<br>(0.01)          | 0.08<br>(0.02)           | -29.48<br>(0.00) | NA             | NA             | 0.86<br>(0.00) | N-shaped               | 841; 4892                            |
|               | Freight coastal             | 10 <sup>8</sup> tkm | 40.56<br>(0.02)  | -5.95<br>(0.02)          | 0.29<br>(0.02)           | -85.37<br>(0.02) | 0.48<br>(0.01) | NA             | 0.96<br>(0.00) | N-shaped               | NA                                   |
|               | Freight oceangoing          | 10 <sup>8</sup> tkm | NA               | NA                       | NA                       | 13.35            | 0.98           | NA             | 0.99           | NA                     | NA                                   |

|                       |                                |                                |                                  |                 |                 |                  |                 |                |                |                      |                 |    |
|-----------------------|--------------------------------|--------------------------------|----------------------------------|-----------------|-----------------|------------------|-----------------|----------------|----------------|----------------------|-----------------|----|
| Per capita<br>impacts | Excess watershed<br>fertilizer | kg                             | 4.03<br>(0.00)                   | -0.27<br>(0.00) | NA              | -11.82<br>(0.00) | 0.76<br>(0.00)  | NA             | 0.99<br>(0.00) | Inversed<br>U-shaped | 1931            |    |
|                       | CO <sub>2</sub>                | kg C                           | 11.67<br>(0.00)                  | -1.80<br>(0.01) | 0.10<br>(0.00)  | -19.49<br>(0.01) | 0.70<br>(0.00)  | 0.60<br>(0.00) | 0.99<br>(0.00) | N-shaped             | NA              |    |
|                       | EEZ catch                      | kg                             | -8.58<br>(0.00)                  | 1.44<br>(0.00)  | -0.08<br>(0.00) | 18.08<br>(0.00)  | 0.57<br>(0.00)  | NA             | 0.94<br>(0.00) | Inversed<br>N-shaped | (125); 2337     |    |
|                       | EEZ catch<br>(1950-1998)       | kg                             | 5.39<br>(0.03)                   | -1.08<br>(0.02) | 0.07<br>(0.01)  | -7.41<br>(0.10)  | NA              | NA             | 0.93<br>(0.00) | N-shaped             | NA              |    |
|                       | Global catch                   | kg                             | -10.87<br>(0.00)                 | 1.86<br>(0.00)  | -0.10<br>(0.00) | 22.40<br>(0.00)  | 0.70<br>(0.00)  | NA             | 0.98<br>(0.00) | Inversed<br>N-shaped | (119); 1818     |    |
|                       | Global catch<br>(1950-1998)    | kg                             | -1.63<br>(0.00)                  | 0.17<br>(0.00)  | NA              | 5.78<br>(0.00)   | 0.74<br>(0.00)  | NA             | 0.96<br>(0.00) | U-shaped             | (107)           |    |
|                       | Mariculture                    | m <sup>2</sup>                 | 4.00<br>(0.00)                   | -0.23<br>(0.00) | NA              | -13.67<br>(0.00) | 0.47<br>(0.01)  | NA             | 0.99<br>(0.00) | Inversed<br>U-shaped | 5516            |    |
|                       | Saltpan                        | m <sup>2</sup>                 | 0.79<br>(0.00)                   | -0.06<br>(0.00) | NA              | -0.66<br>(0.20)  | NA              | NA             | 0.60<br>(0.00) | Inversed<br>U-shaped | 1166            |    |
|                       | Passenger                      | 10 <sup>-6</sup> pkm           | -0.17<br>(0.02)                  | NA              | NA              | 7.88<br>(0.00)   | 0.61<br>(0.00)  | NA             | 0.66<br>(0.00) | Linear decrease      | NA              |    |
|                       | Freight coastal                | tkm                            | 38.13<br>(0.02)                  | -5.61<br>(0.02) | 0.28<br>(0.02)  | -80.91<br>(0.03) | 0.48<br>(0.01)  | NA             | 0.95<br>(0.00) | N-shaped             | NA              |    |
|                       | Freight oceangoing             | tkm                            | NA                               | NA              | NA              | 11.64<br>(0.00)  | 0.98<br>(0.00)  | NA             | 0.99<br>(0.00) | NA                   | NA              |    |
|                       | Cross-sectional                | Excess watershed<br>fertilizer | t/km <sup>2</sup> land<br>area   | 1.09<br>(0.05)  | NA              | NA               | -6.41<br>(0.12) | NA             | NA             | 0.10<br>(0.05)       | Linear increase | NA |
|                       |                                | CO <sub>2</sub>                | t C/km <sup>2</sup> land<br>area | 1.68<br>(0.01)  | NA              | NA               | -5.29<br>(0.05) | NA             | NA             | 0.44<br>(0.00)       | Linear increase | NA |



|       |                                |                                     |                  |                 |                 |                   |    |    |                |                      |             |
|-------|--------------------------------|-------------------------------------|------------------|-----------------|-----------------|-------------------|----|----|----------------|----------------------|-------------|
|       | Coastal sewage                 | 10 <sup>4</sup> t/km<br>coastline   | 1.26<br>(0.08)   | NA              | NA              | -4.53<br>(0.39)   | NA | NA | 0.22<br>(0.08) | Linear increase      | NA          |
|       | Fishery catch                  | t/km<br>coastline                   | NA               | NA              | NA              | NA                | NA | NA | NA             | NA                   | NA          |
|       | Mariculture                    | km <sup>2</sup> /km<br>coastline    | 60.47<br>(0.01)  | -3.99<br>(0.01) | NA              | -228.94<br>(0.01) | NA | NA | 0.60<br>(0.01) | Inversed<br>U-shaped | 1959        |
|       | Saltpan                        | km <sup>2</sup> /km<br>coastline    | NA               | NA              | NA              | NA                | NA | NA | NA             | NA                   | NA          |
|       | Passenger                      | 10 <sup>4</sup> pkm/km<br>coastline | 2.02<br>(0.03)   | NA              | NA              | -12.50<br>(0.06)  | NA | NA | 0.52<br>(0.03) | Linear increase      | NA          |
|       | Freight coastal                | 10 <sup>4</sup> tkm/km<br>coastline | -34.88<br>(0.02) | 2.41<br>(0.01)  | NA              | 133.34<br>(0.02)  | NA | NA | 0.79<br>(0.00) | U-shaped             | 1376        |
|       | Freight oceangoing             | 10 <sup>4</sup> tkm/km<br>coastline | 4.63<br>(0.00)   | NA              | NA              | -26.97<br>(0.01)  | NA | NA | 0.68<br>(0.00) | Linear increase      | NA          |
| Panel | Excess watershed<br>fertilizer | t/km <sup>2</sup><br>landarea       | 6.71<br>(0.00)   | -0.72<br>(0.00) | 0.03<br>(0.01)  | -19.05<br>(0.00)  | NA | NA | 0.98<br>(0.00) | N-shaped             | NA          |
|       | CO <sub>2</sub>                | t C/km <sup>2</sup><br>landarea     | -11.93<br>(0.00) | 1.80<br>(0.00)  | -0.08<br>(0.00) | 30.74<br>(0.00)   | NA | NA | 0.99<br>(0.00) | Inversed<br>N-shaped | (187); 8528 |
|       | Coastal sewage                 | 10 <sup>4</sup> t/km<br>coastline   | 1.95<br>(0.00)   | -0.10<br>(0.00) | NA              | -4.11<br>(0.01)   | NA | NA | 0.99<br>(0.00) | Inversed<br>U-shaped | 27865       |
|       | Fishery catch                  | t/km<br>coastline                   | -3.12<br>(0.05)  | 0.80<br>(0.00)  | -0.05<br>(0.00) | 6.75<br>(0.05)    | NA | NA | 0.90<br>(0.00) | Inversed<br>N-shaped | (14); 2341  |
|       | Fishery catch<br>(1978-1998)   | t/km<br>coastline                   | -11.62<br>(0.00) | 2.17<br>(0.00)  | -0.12<br>(0.00) | 24.15<br>(0.00)   | NA | NA | 0.89<br>(0.00) | Inversed<br>N-shaped | (66); 1633  |
|       | Mariculture+0.001 °            | km <sup>2</sup> /km<br>coastline    | -16.32<br>(0.00) | 3.00<br>(0.00)  | -0.17<br>(0.00) | 24.17<br>(0.00)   | NA | NA | 0.85<br>(0.00) | Inversed<br>N-shaped | (67); 2113  |
|       | Saltpan+0.013 °                | km <sup>2</sup> /km                 | 3.83             | -0.28           | NA              | -14.45            | NA | NA | 0.73           | Inversed             | 968         |

|                            |                        |        |        |        |         |    |    |        |                 |    |
|----------------------------|------------------------|--------|--------|--------|---------|----|----|--------|-----------------|----|
|                            | coastline              | (0.00) | (0.00) |        | (0.00)  |    |    | (0.00) | U-shaped        |    |
| Passenger                  | 10 <sup>4</sup> pkm/km | 0.35   | NA     | NA     | 0.25    | NA | NA | 0.86   | Linear increase | NA |
|                            | coastline              | (0.05) |        |        | (0.86)  |    |    | (0.00) |                 |    |
| Freight coastal            | 10 <sup>4</sup> tkm/km | 107.72 | -13.51 | 0.58   | -282.50 | NA | NA | 0.95   | N-shaped        | NA |
|                            | coastline              | (0.00) | (0.00) | (0.00) | (0.00)  |    |    | (0.00) |                 |    |
| Freight                    | 10 <sup>4</sup> tkm/km | 0.62   | NA     | NA     | 3.81    | NA | NA | 0.83   | Linear increase | NA |
| oceangoing+22 <sup>c</sup> | coastline              | (0.04) |        |        | (0.09)  |    |    | (0.00) |                 |    |

---

**a**, The EKC curve shape is defined according to the signs of the estimated coefficients of  $\ln(x)$ ,  $\ln(x)^2$  and  $\ln(x)^3$  (see refs. 51, 52);

**b**, the turning points with parentheses are those small ones omitted to define the EKC shape in Table 1 of the main text; and

**c**, the value (the minimum in the original data, except zero) was added for log-transformation considerations.

**Supplementary Table S5** Summary of the results of tests of the EKC relationship between GDP per capita ( $x_t$ ) and various human impacts ( $y_t$ ), with trade openness ( $o_t$ ), population density ( $p_t$ ) and time trend ( $t_t$ ) included as explanatory variables. NA, not apply or not exist.

| $\ln(y_t)$                  | Unit            | $\ln x_t$        | $(\ln x_t)^2$   | $(\ln x_t)^3$   | $\ln o_t$       | $\ln p_t$       | $t_t$           | $C$               | AR(1)           | MA(1)          | Adjusted $R^2$ | EKC shape         | Turning points (USD) |
|-----------------------------|-----------------|------------------|-----------------|-----------------|-----------------|-----------------|-----------------|-------------------|-----------------|----------------|----------------|-------------------|----------------------|
| Excess watershed fertilizer | $10^4$ t        | 3.29<br>(0.00)   | -0.25<br>(0.00) | NA              | -0.02<br>(0.89) | 0.71<br>(0.79)  | 0.05<br>(0.40)  | -9.24<br>(0.46)   | 0.66<br>(0.00)  | NA             | 0.99<br>(0.00) | Inversed U-shaped | 662                  |
| CO <sub>2</sub>             | $10^3$ t C      | 1.21<br>(0.00)   | NA              | NA              | 0.01<br>(0.89)  | 1.67<br>(0.19)  | -0.06<br>(0.02) | -0.39<br>(0.94)   | 0.85<br>(0.00)  | 0.50<br>(0.00) | 0.99<br>(0.00) | N-shaped          | NA                   |
| EEZ catch                   | t               | -10.50<br>(0.00) | 1.79<br>(0.00)  | -0.09<br>(0.00) | -0.09<br>(0.27) | 2.13<br>(0.20)  | -0.02<br>(0.46) | 22.83<br>(0.00)   | 0.53<br>(0.00)  | NA             | 0.97<br>(0.00) | Inversed N-shaped | (102); 3197          |
| EEZ catch (1950-1998)       | t               | 10.35<br>(0.00)  | -2.04<br>(0.00) | 0.13<br>(0.00)  | 0.16<br>(0.02)  | 1.13<br>(0.26)  | 0.00<br>(0.83)  | -9.47<br>(0.13)   | NA              | NA             | 0.98<br>(0.00) | N-shaped          | (90); 329            |
| Global catch                | t               | -12.49<br>(0.00) | 2.16<br>(0.00)  | -0.12<br>(0.00) | -0.05<br>(0.51) | 1.40<br>(0.25)  | -0.01<br>(0.53) | 30.42<br>(0.00)   | 0.68<br>(0.00)  | NA             | 0.99<br>(0.00) | Inversed N-shaped | (109); 1974          |
| Global catch (1950-1998)    | t               | -1.63<br>(0.01)  | 0.17<br>(0.00)  | NA              | 0.04<br>(0.62)  | 0.88<br>(0.52)  | 0.00<br>(0.96)  | 13.50<br>(0.04)   | 0.73<br>(0.00)  | NA             | 0.98<br>(0.00) | U-shaped          | (110)                |
| Mariculture                 | km <sup>2</sup> | 4.16<br>(0.00)   | -0.24<br>(0.00) | NA              | -0.07<br>(0.68) | 0.26<br>(0.92)  | 0.01<br>(0.94)  | -9.77<br>(0.53)   | 0.44<br>(0.06)  | NA             | 0.99<br>(0.00) | Inversed U-shaped | 5791                 |
| Saltpan                     | km <sup>2</sup> | NA               | NA              | NA              | -0.10<br>(0.36) | 1.39<br>(0.34)  | 0.00<br>(0.96)  | 0.37<br>(0.96)    | 0.71<br>(0.00)  | NA             | 0.88<br>(0.00) | NA                | NA                   |
| Passenger                   | $10^8$ pkm      | 30.50<br>(0.00)  | -4.11<br>(0.00) | 0.19<br>(0.00)  | 0.16<br>(0.01)  | 9.71<br>(0.00)  | -0.28<br>(0.00) | -120.32<br>(0.00) | -0.57<br>(0.01) | NA             | 0.84<br>(0.00) | N-shaped          | NA                   |
| Freight coastal             | $10^8$ tkm      | 21.32<br>(0.00)  | -2.89<br>(0.00) | 0.15<br>(0.00)  | 0.49<br>(0.00)  | 16.18<br>(0.00) | -0.38<br>(0.00) | -130.95<br>(0.00) | NA              | NA             | 0.98<br>(0.00) | N-shaped          | NA                   |
| Freight oceangoing          | $10^8$ tkm      | 11.60<br>(0.01)  | -1.89<br>(0.01) | 0.10<br>(0.01)  | 0.34<br>(0.01)  | 1.60<br>(0.49)  | 0.13<br>(0.00)  | -28.52<br>(0.01)  | 0.55<br>(0.00)  | NA             | 1.00<br>(0.00) | N-shaped          | (124); 4389          |

**Supplementary Table S6** Coefficients of plant utilization of agricultural fertilizers in different province \* fertilization amount combinations in China, based on the median in ref. 20. The coefficients of plant utilization were only determined in six typical provinces in ref. 19, and those in the adjacent provinces were assumed to be the same. NA, not apply.

| Geographical regions                                                                        | Fertilization rates (kg/hm <sup>2</sup> ) |         |         |         |
|---------------------------------------------------------------------------------------------|-------------------------------------------|---------|---------|---------|
|                                                                                             | 0-100                                     | 100-200 | 200-300 | 300-500 |
| <b>Northern coastal:</b> Shandong, Hebei, Beijing, Tianjin, Liaoning, Jilin, Jiangsu        | 0.44                                      | 0.37    | 0.30    | 0.20    |
| <b>Southern coastal:</b> Guangdong, Guangxi, Shanghai, Fujian, Zhejiang                     | NA                                        | 0.38    | 0.29    | 0.20    |
| <b>Northern central:</b> Henan, Anhui                                                       | 0.38                                      | 0.27    | 0.21    | 0.16    |
| <b>Southern central:</b> Hunan, Hubei, Jiangxi                                              | 0.51                                      | 0.39    | 0.29    | 0.18    |
| <b>Northern west:</b> Shanxi (East), Shanxi (West), Gansu, Qinghai, Ningxia, Inner Mongolia | 0.42                                      | 0.31    | 0.23    | 0.15    |
| <b>Southern west:</b> Guizhou, Chongqing, Sichuan, Yunnan, Xizang                           | 0.51                                      | 0.32    | 0.21    | 0.10    |

## References in Supplementary Information

1. Halpern, B. S. *et al.* A global map of human impact on marine ecosystems. *Science* **319**, 948-952 (2008).
2. Molnar, J. L., Gamboa, R. L., Revenga, C. & Spalding, M. D. Assessing the global threat of invasive species to marine biodiversity. *Front. Ecol. Environ.* **6**, 485–492 (2008).
3. Halpern, B. S. *et al.* An index to assess the health and benefits of the global ocean. *Nature* **488**, 615–620 (2012).
4. Barbier, E., Hacker, S., Koch, E., Stier, A., Silliman, B. R. The value of estuarine and coastal ecosystem services. *Ecol. Monogr.* **81**, 169–193 (2011).
5. Worm, B. *et al.* Impacts of biodiversity loss on ocean ecosystem services. *Science* **314**, 787-790 (2006).
6. Ning, X. *et al.* Long-term environmental change and the responses of the ecosystems in the Bohai Sea during 1960–1996. *Deep-Sea Res. Pt. II* **57**, 1079-1091 (2010).
7. Lin, C., Ning, X., Su, J., Lin, Y. & Xu, B. Environmental changes and the responses of the ecosystems of the Yellow Sea during 1976-2000. *J. Mar. Syst.* **55**, 223-234 (2005).
8. Ning, X. *et al.* Long-term changes of dissolved oxygen, hypoxia, and the responses of the ecosystems in the East China Sea from 1975 to 1995. *J. Oceanogr.* **67**, 59-75 (2011).
9. Ning, X. *et al.* Long term changes in the ecosystem in the northern South China Sea during 1976-2004. *Biogeosciences* **6**, 2227-2243 (2009).
10. Li, Z., Shan, X., Jin, X. & Dai, F. Long-term variations in body length and age at maturity of the small yellow croaker (*Larimichthys polyactis* Bleeker, 1877) in the Bohai Sea and the Yellow Sea, China. *Fish. Res.* **110**, 67–74 (2011).
11. Jin, X. Long-term changes in fish community structure in the Bohai Sea, China. *Estuar. Coast Shelf. Sci.* **59**, 163–171 (2004).
12. Niu, Z. G. *et al.* Mapping wetland changes in China between 1978 and 2008. *Chin. Sci. Bull.* **57**, 2813–2823 (2012).
13. National Bureau of Statistics of China. *China Statistical Yearbook*. China Statistics Press, Beijing (1981-2011).
14. State Oceanic Administration People’s Republic of China. *China Marine Statistical Yearbook*. China Ocean Press, Beijing (1993, 1997-2010).
15. Xu, Y. L. & Zhou, J. D. Analysis of recent shoreline changes in major areas of coastal mudflats in Shanghai. *Shanghai Water Resources* **3**, 30-36 (1989).

16. Ruan, J. J. *Research on spatial-temporal dynamics and ecosystem services evaluation of tidal marshes in Shanghai based on remote sensing*. Donghua Univ., Shanghai (2011).
17. Editorial Board. *Yearbook of China Water Resources*. China Water Power Press, Beijing (1989-1996).
18. Chen, J., Zhang, C. K., Lin, K., Ding, X. R. & Yuan, R. H. Reclamation and development of coastal tidal flats in Jiangsu Province. *Journal of Hohai University (Natural Sciences)* **39**, 213-219 (2011).
19. Chen, T., Zeng, X. & Hu, Q. Utilization efficiency of chemical fertilizers among different counties of China. *Acta Geographica Sinica* **57**, 531-538 (2002).
20. Zeng, X. & Li, J. Fertilizer application and its effect on grain production in different counties of China. *Scientia Agricultura Sinica* **37**, 387-392 (2004).
21. Huang, J. L. *et al.* Preliminary delineation and classification of estuarine drainage areas for major coastal rivers in China. *Acta Ecologica Sinica* **32**, 3516-3527 (2012).
22. Du, L. Impact factors of China's carbon dioxide emissions: provincial panel data analysis. *South China Economy* **11**, 20-33 (2010).
23. Gao, B. & Shao, A. Study on characteristics, mechanisms and strategies of harmful algal blooms in China coastal waters. *Marine Forecasts* **28**, 69-77 (2011).
24. He, C. & Yang, H. Space-time distribution of red tide events in China and its relationship with the El Niño. *Journal of Shanghai Ocean University* **18**, 206-211 (2009).
25. Liang, S., Qian, H. & Qi, Y. Problem on the red tide in coastal China sea. *Ecologic Science* **19**, 44-50 (2000).
26. State Oceanic Administration People's Republic of China. *Bulletin of Marine Environmental Status of China* (1989-2010). <http://www.soa.gov.cn/soa/index.htm>
27. State Oceanic Administration People's Republic of China. *Bulletin of Marine Disasters in China* (1997-2010). <http://www.soa.gov.cn/soa/index.htm>
28. Zhang, L., Zhao, M. & Jiang, X. The change trend of happened frequency and the R/S forecast of frequently happened year for red tide in China. *Marine Science Bulletin* **29**, 72-77 (2010).
29. Zhao, D. *Distribution pattern and satellite remote-sensing detection model of red tide disasters in China*. Ph.D. thesis, East China Normal Univ., Shanghai (2004).
30. Zuo, S. & Li, B. Marine disasters characteristics and its prevention measures in China over the past 20 years. *Meteorology and Disaster Reduction Research* **31**, 28-33 (2008).
31. Liang, Y. *Investigation and Assessment of Red Tide Disasters in China 1933-2009* (Ocean Press, Beijing, 2012).

32. Chen, T. *et al.* Twenty-five years of change in scleractinian coral communities of Daya Bay (northern South China Sea) and its response to the 2008 AD extreme cold climate event. *Chin. Sci. Bull.* **54**, 2107-2117 (2009).
33. Chen, T. *et al.* Distribution and Status of Scleractinian coral communities in the Daya Bay, Guangdong. *Tropical Geography* **27**, 493-498 (2007).
34. Huang, H. *et al.* Coral cover as a proxy of disturbance: A case study of the biodiversity of the hermatypic corals in Yongxing Island, Xisha Islands in the South China Sea. *Chin. Sci. Bull.* **51**, 129-135 (2006).
35. Li, Y. *et al.* Ecological study on coral reef and intertidal benthos around Yongxing Island, South China Sea. *Oceanologia et Limnologia Sinica* **35**, 176-182 (2004).
36. Lin, Z., Qiu, Y., Zhang, H. & Cheng, T. Distribution and ecological characters of neritic stone corals at Daya Bay. *Journal of Tropical Oceanography* **26**, 63-67 (2007).
37. Shi, Q., Liu, G. H., Yan, H. Q. & Zhang, H. L. Black disease (*Terpios hoshinota*): a probable cause for the rapid coral mortality at the northern reef of Yongxing Island in the South China Sea. *Ambio* **41**, 446-455 (2012).
38. Shi, Q., Zhao, M., Zhang, Q., Wang, H. & Wang, L. Growth variations of scleractinian corals at Luhuitou, Sanya, Hainan Island, and the impacts from human activities. *Acta Ecologica Sinica* **7**, 3316-3323 (2007).
39. Wang, G. Z. *Sedimentology of coral reefs in the South China Sea*. Oceanic Press, Beijing (2001).
40. Wu, Z., Wu, R., Wang, D. & Li, Y. A preliminary study on the status of coral reef health in the southeast coastal regions of Hainan Island. *Chinese Journal of Tropical Crops* **32**, 122-130 (2011).
41. Zhang, Q. *et al.* Status monitoring and health assessment of Luhuitou fringing reef of Sanya, Hainan, China. *Chin. Sci. Bull.* **51**, S81-S88 (2006).
42. Zhang, Y. & Zou, R. Community structure of shallow water stony corals in Daya Bay. *Tropic Oceanology* **6**, 12-18 (1987).
43. Zhao, M., Yu, K., Zhang, Q. & Shi, Q. Long-term change in coral cover in Luhuitou fringing reef, Sanya. *Oceanologia et Limnologia Sinica* **41**, 440-447 (2010).
44. Cao, L., Han, W., Li, F. & Zhang, Y. Change of mangrove wetland landscape pattern and its driving forces in Leizhou Bay. *China Forestry Science and Technology* **24**, 18-23 (2010).
45. Fu X. *et al.* Investigation on the status of mangrove resources and medicinal research in China. II. Resources status, protection and management. *Periodical of Ocean University of China* **39**, 705-711 (2009).

46. Huang, H., Chen, J. & Hu, Z. Analysis on the characteristics of changeable intertidal zones along Guangxi coast in the late of 50 years. *Marine Sciences* **31**, 37-41 (2007).
47. Mao, L. *Assessment of changes in mangrove forest patterns from multitemporal remotely sensed imagery over Zhanjiang City, Guangdong Province*. Master thesis, Nanjing Forestry Univ., Nanjing (2011).
48. Wu, J., Li, N. & Li, C. Change and threats of coastal wetlands in Shenzhen. *Marine Environmental Science* **27**, 278-282 (2008).
49. Yan, J. *et al.* Assessing the areal variation of mangrove coverage forests in the Jiulongjiang Estuary of Fujian China with remote sensing data. *Journal of Xiamen University (Natural Science)* **51**, 426-433 (2012).
50. Zhao, Y. The remote sensing dynamic monitoring of the evolution of shoreline and mangrove wetlands in the Zhujiang River Estuary in the past 30 years. *Remote Sensing for Land & Resources* **86**, 178-184 (2010).
51. Fodha, M. & Zaghdoud, O. Economic growth and pollutant emissions in Tunisia: an empirical analysis of the environmental Kuznets curve. *Energ. Policy* **38**, 1150-1156 (2010).
52. Diao, X. D., Zeng, S. X., Tam, C. M. & Tam, V.W. Y. EKC analysis for studying economic growth and environmental quality: a case study in China. *J. Clean. Prod.* **17**, 541-548 (2009).
